# Supplementary material
Source: publisher figshare collection journal article supplement (https://acs.figshare.com/ndownloader/files/7985188)
Supplement: Supplementary file 1 [file 7985188]

## ***Supporting information***

### **Wellhead Samples of High-Temperature, Low-Permeability Petroleum**

### **Reservoirs Reveal the Microbial Communities in Wellbores**

Zhiyong Song, \*,<sup>†</sup> Zhi Yao,<sup>‡</sup> Fengmin Zhao,<sup>‡</sup> Gangzheng Sun,<sup>‡</sup> Weiyao Zhu<sup>†</sup>

<sup>†</sup> School of Civil and Environmental Engineering, University of Science and Technology Beijing, Beijing 100083, China;

<sup>‡</sup> Oil Production Research Institute, Shengli Oil Field Ltd. Co., SinoPEC, Dongying, 257000, China

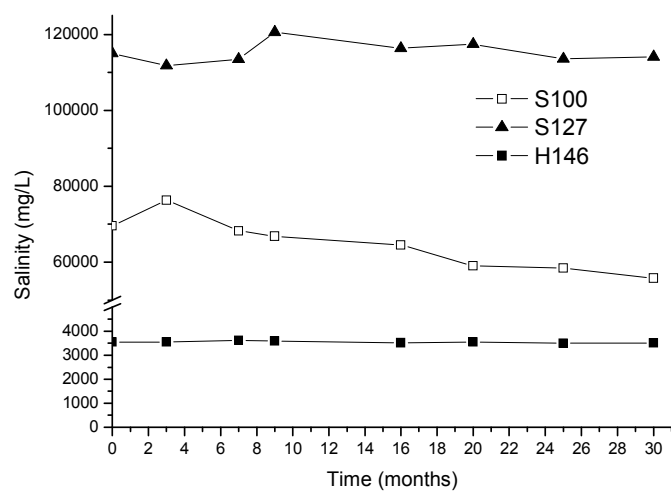

**Figure S1.** Variation of total salinity of produced water during long period

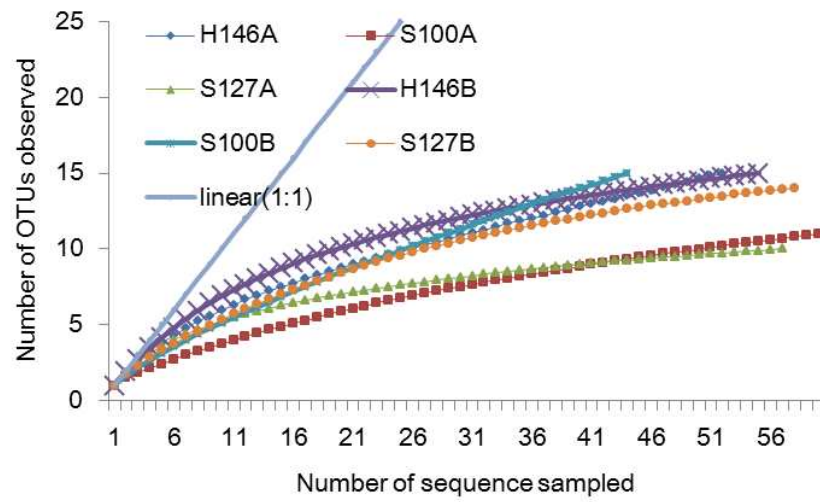

**Figure S2.** Rarefaction curves for samples at OTU level 0.03. Bacterial (H146B, S100B, and S127B) and Archaeal (H146A, S100A, and S127A) libraries.
